# Effect of Periodontitis on Overt Nephropathy and End-Stage Renal Disease in Type 2 Diabetes

WENDY A. SHULTIS, PHD<sup>1</sup>  
E. JENNIFER WEIL, MD<sup>1</sup>  
HELEN C. LOOKER, MBBS<sup>1</sup>  
JEFFREY M. CURTIS, MD, MPH<sup>1</sup>

MARC SHLOSSMAN, DDS, MS<sup>2,3</sup>  
ROBERT J. GENCO, DDS, PHD<sup>2</sup>  
WILLIAM C. KNOWLER, MD, DRPH<sup>1</sup>  
ROBERT G. NELSON, MD, PHD<sup>1</sup>

**OBJECTIVE** — The purpose of this study was to investigate the effect of periodontitis on development of overt nephropathy, defined as macroalbuminuria, and end-stage renal disease (ESRD) in type 2 diabetes.

**RESEARCH DESIGN AND METHODS** — Individuals residing in the Gila River Indian Community aged  $\geq 25$  years with type 2 diabetes, one or more periodontal examination, estimated glomerular filtration rate  $\geq 60$  ml/min per  $1.73\text{ m}^2$ , and no macroalbuminuria (urinary albumin-to-creatinine ratio  $\geq 300$  mg/g) were identified. Periodontitis was classified as none/mild, moderate, severe, or edentulous using number of teeth and alveolar bone score. Subjects were followed to development of macroalbuminuria or ESRD, defined as onset of renal replacement therapy or death attributed to diabetic nephropathy.

**RESULTS** — Of the 529 individuals, 107 (20%) had none/mild periodontitis, 200 (38%) had moderate periodontitis, 117 (22%) had severe periodontitis, and 105 (20%) were edentulous at baseline. During follow-up of up to 22 years, 193 individuals developed macroalbuminuria and 68 developed ESRD. Age- and sex-adjusted incidence of macroalbuminuria and ESRD increased with severity of periodontitis. After adjustment for age, sex, diabetes duration, BMI, and smoking in a proportional hazards model, the incidences of macroalbuminuria were 2.0, 2.1, and 2.6 times as high in individuals with moderate or severe periodontitis or those who were edentulous, respectively, compared with those with none/mild periodontitis ( $P = 0.01$ ). Incidences of ESRD in individuals with moderate or severe periodontitis or in those who were edentulous were 2.3, 3.5, and 4.9 times as high, respectively, compared with those with none/mild periodontitis ( $P = 0.02$ ).

**CONCLUSIONS** — Periodontitis predicts development of overt nephropathy and ESRD in individuals with type 2 diabetes. Whether treatment of periodontitis will reduce the risk of diabetic kidney disease remains to be determined.

*Diabetes Care* 30:306–311, 2007

Periodontitis is a common infection of the periodontal tissues (1) and a major cause of tooth loss in adults (2,3). The most prevalent form is chronic periodontitis (1). Individuals with diabetes are at increased risk of developing periodontitis, and, once established,

periodontitis is more severe in people with diabetes (3–6). Poor glycemic control hastens the progression of periodontitis and, in turn, periodontitis appears to further impair glycemic control (6–8).

Periodontitis predicts cardiovascular disease risk (9) and deaths from diabetic

kidney disease and cardiovascular disease in individuals with type 2 diabetes (10). However, the relationship between periodontitis and diabetic kidney disease has not been fully explored. Among nonobese individuals with type 2 diabetes in Japan, IgG titers for *Porphyromonas gingivalis* (a periodontal pathogen) were correlated with the urinary albumin-to-creatinine ratio (ACR), although analyses were not adjusted for confounding factors (11). In the Atherosclerosis Risk in Communities (ARIC) Study, a largely nondiabetic population, periodontitis was associated with a low estimated glomerular filtration rate (GFR) ( $< 60$  ml/min per  $1.73\text{ m}^2$ ), and this finding remained after adjustment for the presence of diabetes and other potential confounding variables (12).

In the present study, we examined the effect of periodontitis on the development of overt nephropathy, defined by macroalbuminuria (ACR  $\geq 300$  mg/g), and end-stage renal disease (ESRD) in type 2 diabetes in an American-Indian population.

## RESEARCH DESIGN AND METHODS

Data were collected as part of a longitudinal study of diabetes and its complications in the Gila River Indian Community of Arizona (4). The diabetes study was initiated in 1965, and members of the community are invited to attend a research clinic for examination and screening every 2 years. Ethical approval was obtained from the institutional review boards of the National Institute of Diabetes and Digestive and Kidney Diseases and from the Gila River Indian Community Council.

This analysis includes data from all individuals with diabetes whose heritage was at least half Pima or Tohono O'odham and who had one or more periodontal examinations after 25 years of age at which baseline ACR was  $< 300$  mg/g and baseline estimated GFR was  $\geq 60$  ml/min per  $1.73\text{ m}^2$ . Diabetes was diagnosed according to World Health Organization criteria (13) by a 2-h postload plasma glucose concentration  $\geq 200$  mg/dl or from clinical records. Urinary albumin was measured by nephelometric immunoassay (14). Urinary and serum creatinine were

From the <sup>1</sup>Diabetes Epidemiology and Clinical Research Section, Phoenix Epidemiology and Clinical Research Branch, National Institute of Diabetes and Digestive and Kidney Diseases, National Institutes of Health, Phoenix, Arizona; the <sup>2</sup>Department of Oral Biology, State University of New York at Buffalo, Buffalo, New York; and the <sup>3</sup>Arizona School of Dentistry and Oral Health, Mesa, Arizona.

Address correspondence and reprint requests to Dr. Wendy A. Shultis, National Institutes of Health, 1550 E. Indian School Rd., Phoenix, AZ 85014-4972. E-mail: shultisw@mail.nih.gov.

Received for publication 7 June 2006 and accepted in revised form 19 October 2006.

**Abbreviations:** ACR, albumin-to-creatinine ratio; ARIC, Atherosclerosis Risk in Communities; ESRD, end-stage renal disease; GFR, glomerular filtration rate; MDRD, Modification of Diet in Renal Disease.

A table elsewhere in this issue shows conventional and Système International (SI) units and conversion factors for many substances.

DOI: 10.2337/dc06-1184

© 2007 by the American Diabetes Association.

The costs of publication of this article were defrayed in part by the payment of page charges. This article must therefore be hereby marked "advertisement" in accordance with 18 U.S.C. Section 1734 solely to indicate this fact.

measured by a modification of the Jaffe reaction (15). Serum creatinine values were calibrated to the Modification of Diet in Renal Disease (MDRD) Study laboratory, and these values were used to estimate GFR with the four-variable MDRD equation, categorizing individuals as of nonblack ethnicity (16). The correlation between MDRD-estimated GFR and iothalamate GFR in this American-Indian population from preliminary validation work is 0.80 ( $n = 201$ ) (17). The cutoff of 60 ml/min per 1.73 m<sup>2</sup> GFR was chosen on the basis of the guidelines of the National Kidney Foundation to exclude individuals with preexisting impaired GFR (16). ESRD was defined as the requirement for renal replacement therapy due to diabetes or death from diabetic nephropathy. Data on ESRD were collected independently of the biennial research examinations and were complete to 31 December 2002.

Periodontal examinations were conducted between 1983 and 1990. Panoramic radiographs were evaluated and scored by a single examiner (M.S.). Alveolar bone loss was determined by scoring percent bone loss from the cementoenamel junction to the apex at the deepest point on the mesial or distal surfaces of each tooth present, excluding third molars. Periodontitis was classified in order of severity by the number of missing teeth and percent alveolar bone loss as 1) none/mild periodontitis, defined as  $\geq 24$  teeth, of which  $< 6$  had 25–49% bone loss and none had  $\geq 50\%$  bone loss; 2) moderate periodontitis, defined as  $\geq 15$  teeth, of which  $< 7$  had 50–74% bone loss and  $< 4$  had  $\geq 75\%$  bone loss; 3) severe periodontitis, defined as 1–14 teeth or greater bone loss than in previous categories; and 4) edentulous. In previous reports, 72% of the tooth loss in this population is attributable to periodontitis (3), and, as such, missing teeth were considered to be lost due to periodontitis, and edentulous individuals were considered to have the most severe manifestation of periodontitis. Although our definition of periodontitis does not permit us to differentiate between aggressive and chronic periodontitis, the majority of cases are likely to represent chronic periodontitis (1).

HbA1c was measured by agar gel electrophoresis until 1989, after which A1C was measured by high-performance liquid chromatography. A1C values were estimated from HbA1 values using the equation  $A1C = (0.99 \times HbA1) - 1.535$  (18). BMI was calculated as weight in ki-

lograms divided by the square of height in meters, and obesity was defined by a BMI  $\geq 30$  kg/m<sup>2</sup>. Smoking status was self-reported as nonsmoking ( $< 100$  cigarettes in a lifetime), prior smoking (have not smoked for past year), currently smoking  $\leq 1$  pack/day, and currently smoking  $> 1$  pack/day. Only five individuals reported currently smoking  $> 1$  pack/day, and smoking was considered as current smoking “yes” or “no” for analysis. Blood pressure was measured at the first and fourth Korotkoff sounds with the subject in the supine position. Mean arterial pressure was calculated as two-thirds diastolic blood pressure + one-third systolic blood pressure. Hypertension was defined by diastolic blood pressure  $\geq 80$  mmHg, systolic blood pressure  $\geq 130$  mmHg, or current usage of antihypertensive medicine (19).

### Statistical analysis

Characteristics of the individuals across categories of periodontitis were explored using the nonparametric Kruskal-Wallis test for continuous variables and the Mantel extension test for categorical variables. Incidence rates were computed as the number of new occurrences of macroalbuminuria or ESRD per 1,000 person-years at risk by age and sex and by periodontitis status, standardized to the 1980 community population. If subjects changed periodontitis strata during follow-up, their person-time was apportioned to the appropriate stratum. Follow-up accumulated only while individuals resided within the community and extended from the date of the first diabetes research examination after the age of 25 years that included a periodontal examination to development of macroalbuminuria or ESRD. For individuals who did not develop either outcome, follow-up time was censored: in the case of the macroalbuminuria analysis at the date of the last research examination and for the ESRD analysis at development of ESRD not due to diabetes, date of death from causes other than diabetic nephropathy if death occurred before 31 December 2002 or at 31 December 2002. Linear association was computed by the Mantel extension test, modified for person-time denominators.

The effect of periodontitis on incidence of macroalbuminuria and ESRD was also examined using time-dependent Cox proportional hazards models to control for the effects of potentially confounding variables. Final models were

adjusted for age at baseline, sex, duration of diabetes at baseline, BMI, and current smoking. A1C was considered both a potential confounder and intermediary in the relationship of periodontitis to macroalbuminuria and ESRD, and final models were repeated with additional adjustment for A1C. Assumptions of proportionality were checked using log follow-up time interaction terms for each baseline variable. Residual versus linear predictor plots were checked for outliers. Product terms of predictor variables, including sex interactions, did not improve the models and were not included. To maintain proportionality assumptions, final models for macroalbuminuria were stratified by baseline age and BMI, and final models for ESRD were stratified by baseline BMI and current smoking. Such stratification controls for confounding by the variables but does not allow estimation of their effects. Time-dependent models were constructed to allow the values for periodontitis, A1C, and current smoking (macroalbuminuria only) to change with time. The overall effect of periodontitis on the incidence of macroalbuminuria and ESRD was assessed by likelihood ratio tests comparing time-dependent models with and without terms for periodontitis. Statistical analyses were performed using SAS software version 8 (SAS Institute, Cary, NC).

**RESULTS** — Among the 529 individuals (168 men and 361 women) included in this study, 107 (20%) had none/mild periodontitis, 200 (38%) had moderate periodontitis, and 117 (22%) had severe periodontitis, and 105 individuals (20%) were edentulous at baseline (Table 1). Age, diabetes duration, A1C (all  $P < 0.0001$ ), and hypertension ( $P = 0.01$ ) at baseline were positively associated with severity of periodontitis, whereas BMI and obesity were negatively associated with severity of periodontitis (both  $P < 0.0001$ ). During a median follow-up of 9.4 years (range 0.03–21.6 years), 193 individuals developed macroalbuminuria, and during a median follow-up of 14.9 years (0.03–21.8 years), 68 individuals developed ESRD. The unadjusted incidence of macroalbuminuria and ESRD were 37.5 cases/1,000 person-years and 9.0 cases/1,000 person-years, respectively. Incidence rates of macroalbuminuria and ESRD by age and sex are shown in Table 2.

Age- and sex-adjusted incidence rates of macroalbuminuria and ESRD were

Table 1—Characteristics of the individuals in this analysis by periodontitis status at baseline

| Continuous variables      | Periodontitis status |                  |                  |                  | P for trend |
|---------------------------|----------------------|------------------|------------------|------------------|-------------|
|                           | None or mild         | Moderate         | Severe           | Edentulous       |             |
| <i>n</i>                  | 107                  | 200              | 117              | 105              |             |
| Age (years)               | 33 (25–72)           | 44 (25–72)       | 49 (26–77)       | 55 (25–79)       | <0.0001     |
| Diabetes duration (years) | 1.9 (0.0–19.7)       | 4.3 (0.0–26.4)   | 7.9 (0.0–24.6)   | 12.3 (0.0–32.4)  | <0.0001     |
| A1C (%)                   | 6.1 (3.8–13.0)       | 7.4 (2.7–13.4)   | 9.4 (2.8–15.9)   | 9.1 (4.2–14.2)   | <0.0001     |
| BMI (kg/m <sup>2</sup> )  | 38.6 (24.6–71.1)     | 33.3 (21.0–55.0) | 30.2 (20.5–54.4) | 29.8 (21.9–65.4) | <0.0001     |
| MAP (mmHg)                | 88 (67–117)          | 91 (57–133)      | 92 (69–135)      | 92 (63–128)      | 0.25        |
| Categorical variables     |                      |                  |                  |                  |             |
| Male                      | 24 (22.4)            | 80 (40.0)        | 39 (33.3)        | 25 (23.8)        | 0.66        |
| Obese                     | 93 (86.9)            | 141 (70.5)       | 61 (52.1)        | 51 (48.6)        | <0.0001     |
| Hypertensive              | 47 (43.9)            | 98 (49.8)        | 64 (55.7)        | 63 (60.0)        | 0.01        |
| Currently smoking         | 21 (19.6)            | 53 (26.5)        | 26 (22.2)        | 14 (13.5)        | 0.15        |

Data are median (range) or *n* (%). Total *n* = 529. Missing data: *n* = 3 for baseline mean arterial pressure (MAP), *n* = 13 for baseline A1C, *n* = 5 for baseline hypertension, and *n* = 1 for baseline smoking.

positively associated with severity of periodontitis ( $P = 0.0001$  and  $P = 0.003$ , respectively; Fig. 1). Moderate and severe periodontitis and edentulousness predicted the development of macroalbuminuria in a dose-dependent manner after adjustment for age, sex, duration of diabetes, and BMI at baseline and updated periodontal and smoking status at each examination (Table 3). The hazard rate ratios (HRRs) for moderate or severe periodontitis and edentulousness were 2.0 (95% CI 1.2–3.5), 2.1 (1.2–3.8), and 2.6 (1.4–4.6), respectively (overall  $P = 0.01$ ). This relationship was attenuated after adjustment for A1C, updated at each examination; HRR for moderate periodontitis was 1.7 (0.95–3.0), for severe periodontitis was 1.6 (0.9–3.0), and for edentulousness was 2.0 (1.1–3.6) (overall  $P = 0.17$ ). Periodontitis also predicted the development of ESRD after adjustment for age, sex, duration of diabetes, BMI, and smoking status at baseline and updated periodontal status at each exam-

ination (overall  $P = 0.02$ ) (Table 3). The relationship between periodontitis and ESRD was also attenuated after adjustment for A1C, updated at each examination; HRR for moderate periodontitis was 1.3 (0.4–4.9), for severe periodontitis was 1.8 (0.5–6.7), and for edentulousness was 2.5 (0.7–9.4) (overall  $P = 0.21$ ).

**CONCLUSIONS**— Periodontitis predicts the development of overt nephropathy and ESRD in a dose-dependent manner in individuals with little or no preexisting kidney disease after adjustment for age, sex, duration of diabetes, BMI, and current smoking. These findings confirm the emerging evidence of an independent association between periodontitis and the development of diabetic kidney disease. To our knowledge, only two studies have investigated the effect of periodontitis on early kidney disease (11,12). These studies were cross-sectional; one was in a largely nondiabetic population (12), and the other did not

explore the effect of potential confounders (11). The present study, however, was prospective, conducted exclusively in individuals with diabetes, and included a proportionately large number of individuals with kidney disease. Data on change in periodontal status were collected (on up to four occasions for each individual), and models allowed periodontitis and A1C to change at each examination. Current smoking data were also updated at each examination in the macroalbuminuria analysis. Furthermore, all of the study participants had an estimated GFR  $\geq 60$  ml/min per 1.73 m<sup>2</sup> and did not have macroalbuminuria at baseline. Macroalbuminuria and not microalbuminuria was chosen as an outcome in our analysis because microalbuminuria is much more likely to regress than macroalbuminuria, and restricting our dataset to individuals without microalbuminuria at baseline reduced our sample size by approximately one-third.

Implicit in a time-dependent analysis

Table 2—Incidence of overt nephropathy, characterized by macroalbuminuria (MA), and ESRD per 1,000 person-years (PYRs) by age and sex in an American-Indian population with type 2 diabetes

| Age-group (years) | Men   |       |           | Women |       |           |
|-------------------|-------|-------|-----------|-------|-------|-----------|
|                   | Cases | PYRs  | Incidence | Cases | PYRs  | Incidence |
| MA                |       |       |           |       |       |           |
| 25–44             | 14    | 542   | 25.8      | 34    | 1,386 | 24.5      |
| 45–64             | 37    | 792   | 46.7      | 77    | 1,864 | 41.3      |
| $\geq 65$         | 6     | 128   | 46.8      | 25    | 436   | 57.4      |
| ESRD              |       |       |           |       |       |           |
| 25–44             | 3     | 658   | 4.6       | 3     | 1,660 | 1.8       |
| 45–64             | 15    | 1,265 | 11.9      | 26    | 2,592 | 10.0      |
| $\geq 65$         | 3     | 320   | 9.4       | 18    | 1,033 | 17.4      |

*n* = 529.

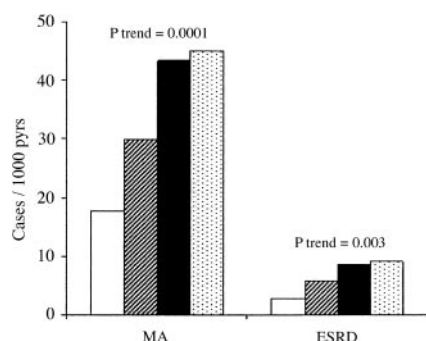

**Figure 1**—Age- and sex-adjusted incidence of overt nephropathy, characterized by macroalbuminuria (MA), and ESRD per 1,000 person-years across categories of periodontitis in an American-Indian population with diabetes ( $n = 529$ ). □, none/mild periodontitis; ▨, moderate periodontitis; ■, severe periodontitis; ▩, edentulous.

are the assumptions that the study exposure (in this case, periodontitis) does not affect any covariates used as regressors and that there is no confounding within levels of the other covariates. These assumptions may not be valid when the exposure and the covariates vary over time, because a covariate may be affected by the exposure and also be a confounder. In the present analysis, the level of hyperglycemia may be a confounder because it is a known risk factor for kidney disease (20) and is associated with periodontitis (3,4,6). On the other hand, the level of glycemia also rises as a consequence of periodontitis (6,7). A1C may therefore be both a confounder and an intermediate variable on the causal pathway between periodontitis and kidney disease, and a proportional hazards analysis that includes A1C as a time-dependent covariate will underestimate the effect of periodon-

titis on the development of kidney disease. Nevertheless, exclusion of this variable may cause confounding. Accordingly, we examined the effect of periodontitis on kidney disease by using two models, but we favor the model that did not control for A1C (Table 3) because this variable is almost certainly an intermediate variable in the pathway of interest.

BMI was inversely associated with severity of periodontitis at baseline in this analysis (Table 1), in contrast to the positive association between BMI and periodontitis reported in the ARIC Study (12). However, the ARIC Study was conducted in a predominantly nondiabetic population. After diabetes diagnosis, BMI declines in Pima Indians, and this decline continues with increasing diabetes duration (21). Given that poor glycemic control hastens the progression of periodontitis (6,8) and glycemic control tends to worsen with increasing diabetes duration (22), an inverse association between BMI and severity of periodontitis in individuals with diabetes is expected. Indeed, after adjustment for age, diabetes duration, and A1C, the association between BMI and periodontitis at baseline was no longer significant (data not shown).

Smoking is associated with both periodontitis (23,24) and kidney disease (25,26) and may confound the relationship between these diseases. Nevertheless, fewer than 1% of adult Pima Indians smoke one pack or more of cigarettes per day. In this population, current smoking is not a prominent risk factor for fatal coronary heart disease (27) and did not explain the relationship between periodontitis and kidney disease in the present study. However, given our mea-

sures of smoking, the possibility of residual confounding due to smoking in this analysis cannot be excluded. High blood pressure is strongly associated with diabetic kidney disease (28); however, hypertension was not considered a potential confounding factor in our analysis, because when we adjusted our final time-dependent models for hypertension, the association of periodontitis with macroalbuminuria and ESRD remained unchanged (data not shown). Furthermore, to our knowledge there is no published evidence linking blood pressure with risk of development of periodontitis. The positive association between the presence of hypertension and severity of periodontitis at baseline in the present analysis was attributable, in part, to the higher average age of individuals who were edentulous or had severe periodontitis (data not shown). Finally, the effect of periodontitis on macroalbuminuria and ESRD may be underestimated to the extent that complete tooth loss was due to factors other than periodontitis.

A proposed mechanism for the effect of periodontitis on the development of kidney disease is systemic inflammation. Both periodontitis and kidney disease are associated with inflammatory markers such as C-reactive protein (29,30), and chronic low-level inflammation associated with periodontitis may lead to endothelial dysfunction, which plays a role in the pathogenesis of kidney disease (31,32). Periodontitis is treatable, and treatment by tooth extraction (33) or other mechanical procedures and locally administered antibiotics (34) lowers levels of C-reactive protein and other inflammatory markers. In edentulous individuals, the potentially deleterious effects of sys-

**Table 3**—Time-dependent Cox proportional hazards models of the effect of periodontitis (PD) on the incidence of overt nephropathy, characterized by macroalbuminuria (MA), and ESRD in an American-Indian population with type 2 diabetes

| Variable                                 | Effect of PD on MA* |         | Effect of PD on ESRD† |         |
|------------------------------------------|---------------------|---------|-----------------------|---------|
|                                          | HRR (95% CI)        | P value | HRR (95% CI)          | P value |
| Moderate PD (vs. none/mild PD)           | 2.0 (1.2–3.5)       | 0.01‡   | 2.3 (0.6–8.1)         | 0.02‡   |
| Severe PD (vs. none/mild PD)             | 2.1 (1.2–3.8)       |         | 3.5 (0.96–12.4)       |         |
| Edentulous (vs. none/mild PD)            | 2.6 (1.4–4.6)       |         | 4.9 (1.4–17.4)        |         |
| Age at baseline (10 years)               | —                   | —       | 0.8 (0.6–1.0)         | 0.05    |
| Sex (male/female)                        | 0.8 (0.6–1.2)       | 0.30    | 0.8 (0.4–1.4)         | 0.37    |
| Diabetes duration at baseline (10 years) | 2.1 (1.6–2.7)       | <0.0001 | 2.4 (1.5–3.6)         | 0.0001  |
| Smoking (no/yes)                         | 1.2 (0.8–1.7)       | 0.47    | —                     | —       |

$n = 515$ . \*Model stratified by baseline age and BMI because these variables violated the proportionality assumption. †Model stratified by baseline BMI and smoking because these variables violated the proportionality assumption. ‡P value for overall effect of PD on outcome obtained by likelihood ratio test comparing models with and without terms for PD.



temic inflammation on kidney function could occur during the period of active periodontal infection and accumulate during the lifetime of the individual. This hypothesis is supported by the observation that the strongest predictive effect of periodontal status on kidney disease was found in edentulous individuals (Table 3). Cardiovascular disease prevalence and risk is higher or equivalent in edentulous individuals compared with that in individuals with severe periodontitis in some (35,36) but not all studies (37).

In summary, periodontitis predicts the development of both overt nephropathy and ESRD in an American-Indian population with type 2 diabetes. Future studies investigating measures of inflammatory markers may help elucidate the potential mechanisms for the association between periodontitis and diabetic kidney disease. Whether successful management of periodontitis will reduce the risk of diabetic kidney disease, however, remains to be determined.

**Acknowledgments**— This research was supported by the Intramural Research Program of the National Institute of Diabetes and Digestive and Kidney Diseases and the National Institute of Dental and Craniofacial Research (grant no. DE-06514). R.G. received additional support from the Sunstar Company.

The authors are indebted to the members of the Gila River Indian Community for participating in this investigation and to the doctors, nurses, and support staff involved in collecting and processing the data.

## References

- Albandar JM: Epidemiology and risk factors of periodontal diseases. *Dent Clin North Am* 49:517–532, 2005
- Phipps KR, Stevens VJ: Relative contribution of caries and periodontal disease in adult tooth loss for an HMO dental population. *J Public Health Dent* 55:250–252, 1995
- Shlossman M, Knowler WC, Pettitt DJ, Genco RJ: Type 2 diabetes mellitus and periodontal disease. *J Am Dent Assoc* 121:532–536, 1990
- Nelson RG, Shlossman M, Budding LM, Pettitt DJ, Saad MF, Genco RJ, Knowler WC: Periodontal disease and NIDDM in Pima Indians. *Diabetes Care* 13:836–840, 1990
- Taylor GW, Burt BA, Becker MP, Genco RJ, Shlossman M, Knowler WC, Pettitt DJ: Non-insulin dependent diabetes mellitus and alveolar bone loss progression over 2 years. *J Periodontol* 69:76–83, 1998
- Taylor GW: Bidirectional interrelationships between diabetes and periodontal diseases: an epidemiologic perspective. *Ann Periodontol* 6:99–112, 2001
- Taylor GW, Burt BA, Becker MP, Genco RJ, Shlossman M, Knowler WC, Pettitt DJ: Severe periodontitis and risk for poor glycemic control in patients with non-insulin-dependent diabetes mellitus. *J Periodontol* 67:1085–1093, 1996
- Taylor GW, Burt BA, Becker MP, Genco RJ, Shlossman M: Glycemic control and alveolar bone loss progression in type 2 diabetes. *Ann Periodontol* 3:30–39, 1998
- Beck JD, Offenbacher S: Systemic effects of periodontitis: epidemiology of periodontal disease and cardiovascular disease. *J Periodontol* 76:2089–2100, 2005
- Saremi A, Nelson RG, Tulloch-Reid M, Hanson RL, Sievers ML, Taylor GW, Shlossman M, Bennett PH, Genco R, Knowler WC: Periodontal disease and mortality in type 2 diabetes. *Diabetes Care* 28:27–32, 2005
- Kuroe A, Taniguchi A, Sekiguchi A, Ogura M, Murayama Y, Nishimura F, Iwamoto Y, Seino Y, Nagasaka S, Fukushima M, Soga Y, Nakai Y: Prevalence of periodontal bacterial infection in non-obese Japanese type 2 diabetic patients: relationship with C-reactive protein and albuminuria. *Horm Metab Res* 36:116–118, 2004
- Kshirsagar AV, Moss KL, Elter JR, Beck JD, Offenbacher S, Falk RJ: Periodontal disease is associated with renal insufficiency in the Atherosclerosis Risk in Communities (ARIC) study. *Am J Kidney Dis* 45:650–657, 2005
- World Health Organization: *Diabetes Mellitus: Report of a WHO Study Group*. Geneva, World Health Org., 1985 (Tech. Rep. Ser., no. 727)
- Vasquez B, Flock EV, Savage PJ, Nagulesparan M, Bennion LJ, Baird HR, Bennett PH: Sustained reduction of proteinuria in type 2 (non-insulin-dependent) diabetes following diet-induced reduction in hyperglycaemia. *Diabetologia* 26:127–133, 1984
- Chasson AL, Grady HJ, Stanley MA: Determination of creatinine by means of automatic chemical analysis. *Tech Bull Regist Med Technol* 30:207–212, 1960
- National Kidney Foundation: K/DOQI clinical practice guidelines for chronic kidney disease: evaluation, classification and stratification. *Am J Kidney Dis* 39:S1–S266, 2002
- Nelson RG, Greene T, Beck GJ, Van Lente F, Wang X, Knowler WC: Estimating GFR by the MDRD and Cockcroft-Gault equations in Pima Indians (Abstract). *J Am Soc Nephrol* 14:134A, 2003
- Nelson RG, Morgenstern H, Bennett PH: Birth weight and renal disease in Pima Indians with type 2 diabetes mellitus. *Am J Epidemiol* 148:650–656, 1998
- Chobanian AV, Bakris GL, Black HR, Cushman WC, Green LA, Izzo JL, Jones DW, Materson BJ, Oparil S, Wright JT, Roccella EJ, the National High Blood Pressure Education Program Coordinating Committee: The seventh report of the Joint National Committee on Prevention, Detection, Evaluation and Treatment of high blood pressure: the JNC 7 report. *JAMA* 289:2560–2572, 2003
- The Diabetes Control and Complications Trial Research Group: The effect of intensive treatment of diabetes on the development and progression of long term complications in insulin-dependent diabetes mellitus. *N Engl J Med* 329:977–986, 1993
- Looker HC, Knowler WC, Hanson RL: Changes in BMI and weight before and after the development of type 2 diabetes. *Diabetes Care* 24:1917–1922, 2001
- UK Prospective Diabetes Study Group: Intensive blood glucose control with sulphonylureas or insulin compared with conventional treatment and risk of complications in patients with type 2 diabetes (UKPDS). *Lancet* 352:837–853, 1998
- Kinane DF, Chestnutt IG: Smoking and periodontal disease. *Crit Rev Oral Biol Med* 11:356–365, 2000
- Heasman L, Stacey F, Preshaw PM, McCracken GI, Hepburn S, Heasman PA: The effect of smoking on periodontal treatment response: a review of clinical evidence. *J Clin Periodontol* 33:241–253, 2006
- Chase HP, Garg SK, Marshall G, Berg CL, Harris S, Jackson WE, Hamman RE: Cigarette smoking increases the risk of albuminuria among subjects with type 1 diabetes. *JAMA* 265:614–617, 1991
- Haroun MK, Jaar BG, Hoffman SC, Comstock GW, Klag MJ, Coresh J: Risk factors for chronic kidney disease: a prospective study of 23,534 men and women in Washington County, Maryland. *J Am Soc Nephrol* 14:2934–2941, 2003
- Nelson RG, Sievers ML, Knowler WC, Swinburn BA, Pettitt DJ, Saad MF, Liebow IM, Howard BV, Bennett PH: Low incidence of fatal coronary heart disease in Pima Indians despite high prevalence of non-insulin-dependent diabetes. *Circulation* 81:987–998, 1990
- UK Prospective Diabetes Study Group: Efficacy of atenolol and captopril in reducing risk of macrovascular and microvascular complications in type 2 diabetes: UKPDS 39: UK Prospective Diabetes Study Group. *Br Med J* 317:713–720, 1998
- Fried L, Solomon C, Shlipak M, Seliger S, Stehman-Breen C, Bleyer AJ, Chaves P, Furberg C, Kuller L, Newman A: Inflammatory and prothrombotic markers and the progression of renal disease in elderly individuals. *J Am Soc Nephrol* 15:3184–3191, 2004
- Slade GD, Ghezzi EM, Heiss G, Beck JD, Riche E, Offenbacher S: Relationship be-

- tween periodontal disease and C-reactive protein among adults in the Atherosclerosis Risk In Communities Study. *Arch Intern Med* 163:1172–1179, 2003
31. Seinost G, Wimmer G, Skerget M, Thaller E, Brodmann M, Gasser R, Bratschko RO, Pilger E: Periodontal treatment improves endothelial dysfunction in patients with severe periodontitis. *Am Heart J* 149: 1050–1054, 2005
  32. Beck JD, Elter JR, Heiss G, Couper D, Mauriello SM, Offenbacher S: Relationship of periodontal disease to carotid artery intima-media wall thickness: the Atherosclerosis Risk in Communities (ARIC) Study. *Arterioscler Thromb Vasc Biol* 21:1816–1822, 2001
  33. Taylor BA, Tofler GH, Carey HMR, Morel-Kopp M-C, Philcox S, Elliott MJ, Kull AD, Ward C, Schenck K: Full-mouth tooth extraction lowers systemic inflammatory and thrombotic markers of cardiovascular risk. *J Dent Res* 85:74–78, 2006
  34. D'Aiuto F, Nibali L, Parkar M, Suvan J, Tonetti MS: Short-term effects of intensive periodontal therapy on serum inflammatory markers and cholesterol. *J Dent Res* 84:269–273, 2005
  35. Hujoel PP, Drangsholt M, Spiekerman C, Derouen TA: Examining the link between coronary heart disease and the elimination of chronic dental infections. *J Am Dent Assoc* 132:883–889, 2001
  36. Elter JR, Champagne CME, Offenbacher S, Beck JD: Relationship of periodontal disease and tooth loss to prevalence of coronary heart disease. *J Periodontol* 75: 782–790, 2004
  37. Wu T, Trevisan M, Genco RJ, Dorn JP, Falkner KL, Sempos CT: Periodontal disease and risk of cerebrovascular disease: the First National Health and Nutrition Examination Survey and its follow-up study. *Arch Intern Med* 160:2749–2755, 2000
